# Supplementary material for: Nano-LC-MS/MS for Quantification of Lyso-Gb3 and Its Analogues Reveals a Useful Biomarker for Fabry Disease
Source: PubMed Central journal article supplement (PMC4428877; doi:10.1371/journal.pone.0127048), 2015-05-12
Supplement: pone.0127048.s003.pdf [file pone.0127048.s003.pdf]

Table S1. Intra-day assaying of lyso-Gb3 in charcoal-treated plasma.

| Spiked concentration (nM) | Determined concentration (nM)             | Mean determined concentration (nM) | S.D. (nM) | Precision (%) | Accuracy (%) |
|---------------------------|-------------------------------------------|------------------------------------|-----------|---------------|--------------|
| 0.080                     | 0.090<br>0.082<br>0.088<br>0.086<br>0.090 | 0.087                              | 0.003     | 3.7           | 9.1          |
| 0.40                      | 0.35<br>0.36<br>0.37<br>0.38<br>0.36      | 0.36                               | 0.01      | 3.0           | -9.7         |
| 10                        | 9.0<br>8.7<br>9.3<br>9.1<br>9.2           | 9.1                                | 0.2       | 2.4           | -9.5         |
| 200                       | 205<br>198<br>206<br>206<br>204           | 204                                | 3         | 1.6           | 2.0          |
