# Supplementary material for: Nano-LC-MS/MS for Quantification of Lyso-Gb3 and Its Analogues Reveals a Useful Biomarker for Fabry Disease
Source: PubMed Central journal article supplement (PMC4428877; doi:10.1371/journal.pone.0127048), 2015-05-12
Supplement: pone.0127048.s004.pdf [file pone.0127048.s004.pdf]

Table S2. Inter-day assaying of lyso-Gb3 in charcoal-treated plasma.

| Spiked concentration (nM) | Day | Determined concentration (nM)             | Mean determined concentration (nM) | S.D. (nM) | Precision (%) | Accuracy (%) | Overall (n=25)                     |           |               |              |
|---------------------------|-----|-------------------------------------------|------------------------------------|-----------|---------------|--------------|------------------------------------|-----------|---------------|--------------|
|                           |     |                                           |                                    |           |               |              | Mean determined concentration (nM) | S.D. (nM) | Precision (%) | Accuracy (%) |
| 0.08                      | 1   | 0.090<br>0.082<br>0.088<br>0.086<br>0.090 | 0.09                               | 0.00      | 3.7           | 9.1          | 0.08                               | 0.01      | 18.4          | -3.1         |
|                           | 2   | 0.084<br>0.084<br>0.081<br>0.074<br>0.078 | 0.08                               | 0.00      | 5.3           | 0.2          |                                    |           |               |              |
|                           | 3   | 0.074<br>0.066<br>0.071<br>0.063<br>0.075 | 0.07                               | 0.01      | 7.5           | -12.8        |                                    |           |               |              |
|                           | 4   | 0.059<br>0.078<br>0.056<br>0.054<br>0.060 | 0.06                               | 0.01      | 15.5          | -23.4        |                                    |           |               |              |
|                           | 5   | 0.076<br>0.087<br>0.085<br>0.122<br>0.074 | 0.09                               | 0.02      | 21.7          | 11.2         |                                    |           |               |              |
| 0.40                      | 1   | 0.35<br>0.36<br>0.37<br>0.38<br>0.36      | 0.36                               | 0.01      | 3.0           | -9.7         | 0.35                               | 0.02      | 4.7           | -13.0        |
|                           | 2   | 0.35<br>0.37<br>0.33<br>0.35<br>0.35      | 0.35                               | 0.01      | 3.5           | -12.8        |                                    |           |               |              |
|                           | 3   | 0.37<br>0.36<br>0.35<br>0.37<br>0.36      | 0.36                               | 0.01      | 2.3           | -9.7         |                                    |           |               |              |
|                           | 4   | 0.33<br>0.33<br>0.33<br>0.31<br>0.33      | 0.33                               | 0.01      | 3.2           | -18.5        |                                    |           |               |              |
|                           | 5   | 0.35<br>0.34<br>0.35<br>0.34<br>0.33      | 0.34                               | 0.01      | 2.6           | -14.4        |                                    |           |               |              |

| Spiked concentration (nM) | Day | Determined concentration (nM)    | Mean determined concentration (nM) | S.D. (nM) | Precision (%) | Accuracy (%) | Overall (n=25)                     |           |               |              |
|---------------------------|-----|----------------------------------|------------------------------------|-----------|---------------|--------------|------------------------------------|-----------|---------------|--------------|
|                           |     |                                  |                                    |           |               |              | Mean determined concentration (nM) | S.D. (nM) | Precision (%) | Accuracy (%) |
| 10                        | 1   | 9.0<br>8.7<br>9.3<br>9.1<br>9.2  | 9.1                                | 0.2       | 2.4           | -9.5         | 8.95                               | 0.47      | 5.3           | -10.5        |
|                           | 2   | 9.2<br>9.2<br>9.3<br>9.1<br>9.2  | 9.2                                | 0.0       | 0.4           | -8.0         |                                    |           |               |              |
|                           | 3   | 9.4<br>9.5<br>9.0<br>9.0<br>10.0 | 9.3                                | 0.4       | 4.6           | -6.5         |                                    |           |               |              |
|                           | 4   | 7.8<br>8.2<br>8.2<br>8.6<br>8.5  | 8.3                                | 0.3       | 3.7           | -17.3        |                                    |           |               |              |
|                           | 5   | 9.1<br>9.0<br>8.8<br>9.3<br>8.3  | 8.9                                | 0.4       | 4.2           | -11.1        |                                    |           |               |              |
| 200                       | 1   | 205<br>198<br>206<br>206<br>204  | 204                                | 3         | 1.6           | 2.0          | 204                                | 5.96      | 2.9           | 2.1          |
|                           | 2   | 201<br>206<br>203<br>203<br>209  | 204                                | 3         | 1.6           | 2.2          |                                    |           |               |              |
|                           | 3   | 220<br>209<br>201<br>199<br>187  | 203                                | 12        | 6.0           | 1.6          |                                    |           |               |              |
|                           | 4   | 197<br>201<br>201<br>205<br>204  | 202                                | 3         | 1.6           | 0.8          |                                    |           |               |              |
|                           | 5   | 204<br>210<br>209<br>208<br>209  | 208                                | 2         | 1.2           | 3.9          |                                    |           |               |              |
