# Supplementary material for: Nano-LC-MS/MS for Quantification of Lyso-Gb3 and Its Analogues Reveals a Useful Biomarker for Fabry Disease
Source: PubMed Central journal article supplement (PMC4428877; doi:10.1371/journal.pone.0127048), 2015-05-12
Supplement: pone.0127048.s005.pdf [file pone.0127048.s005.pdf]

Table S3. Recovery of lyso-Gb3.

| Sample name |          | Peak area |             | Peak area ratio        | Mean peak area ratio | Recovery (%) |
|-------------|----------|-----------|-------------|------------------------|----------------------|--------------|
|             |          | Lyso-Gb3  | Lyso-Gb3-IS | Lyso-Gb3 / Lyso-Gb3-IS |                      |              |
| QCL         | Recovery | 222233    | 21568203    | 0.010                  | 0.012                | 50           |
|             |          | 265358    | 20407486    | 0.013                  |                      |              |
|             |          | 228035    | 20454159    | 0.011                  |                      |              |
|             |          | 251204    | 19626267    | 0.013                  |                      |              |
|             |          | 256904    | 20162160    | 0.013                  |                      |              |
|             | Control  | 597845    | 25631491    | 0.023                  | 0.024                | -            |
|             |          | 556428    | 22995468    | 0.024                  |                      |              |
|             |          | 560318    | 23117647    | 0.024                  |                      |              |
|             |          | 564116    | 22744450    | 0.025                  |                      |              |
|             |          | 537043    | 23022897    | 0.023                  |                      |              |
| QCM         | Recovery | 8455225   | 24957551    | 0.34                   | 0.33                 | 54           |
|             |          | 8413904   | 24983537    | 0.34                   |                      |              |
|             |          | 7999205   | 23774904    | 0.34                   |                      |              |
|             |          | 8117852   | 24656760    | 0.33                   |                      |              |
|             |          | 7400674   | 22972562    | 0.32                   |                      |              |
|             | Control  | 15337801  | 24880672    | 0.62                   | 0.61                 | -            |
|             |          | 14988083  | 23164373    | 0.65                   |                      |              |
|             |          | 14744547  | 24478187    | 0.60                   |                      |              |
|             |          | 15700478  | 26258309    | 0.60                   |                      |              |
|             |          | 15427579  | 25783518    | 0.60                   |                      |              |
| QCH         | Recovery | 216284989 | 30742564    | 7.0                    | 7.3                  | 50           |
|             |          | 206298651 | 28135604    | 7.3                    |                      |              |
|             |          | 202578296 | 28455672    | 7.1                    |                      |              |
|             |          | 217300438 | 28330117    | 7.7                    |                      |              |
|             |          | 204571374 | 28817681    | 7.1                    |                      |              |
|             | Control  | 406887118 | 27306774    | 15                     | 14                   | -            |
|             |          | 378599731 | 27722681    | 14                     |                      |              |
|             |          | 392977978 | 27547315    | 14                     |                      |              |
|             |          | 370282945 | 25365325    | 15                     |                      |              |
|             |          | 346756729 | 23593515    | 15                     |                      |              |
