# Supplementary material for: Nano-LC-MS/MS for Quantification of Lyso-Gb3 and Its Analogues Reveals a Useful Biomarker for Fabry Disease
Source: PubMed Central journal article supplement (PMC4428877; doi:10.1371/journal.pone.0127048), 2015-05-12
Supplement: pone.0127048.s006.pdf [file pone.0127048.s006.pdf]

Table S4. Precision for Lyso-Gb3 analogues.

| Sample name | Lyso-Gb3(-28)                         |                                            |                   |               | Lyso-Gb3(-12)                         |                                            |                   |               | Lyso-Gb3(-2)                          |                                            |                   |               | Lyso-Gb3(+14)                         |                                            |                   |               |
|-------------|---------------------------------------|--------------------------------------------|-------------------|---------------|---------------------------------------|--------------------------------------------|-------------------|---------------|---------------------------------------|--------------------------------------------|-------------------|---------------|---------------------------------------|--------------------------------------------|-------------------|---------------|
|             | Determined concentration (Area ratio) | Mean determined concentration (Area ratio) | S.D. (Area ratio) | Precision (%) | Determined concentration (Area ratio) | Mean determined concentration (Area ratio) | S.D. (Area ratio) | Precision (%) | Determined concentration (Area ratio) | Mean determined concentration (Area ratio) | S.D. (Area ratio) | Precision (%) | Determined concentration (Area ratio) | Mean determined concentration (Area ratio) | S.D. (Area ratio) | Precision (%) |
| Low         | N.D                                   |                                            |                   |               | N.D                                   |                                            |                   |               | 0.012                                 |                                            |                   |               | N.D                                   |                                            |                   |               |
|             | N.D                                   |                                            |                   |               | N.D                                   |                                            |                   |               | 0.012                                 | 0.012                                      | 0.001             | 5.4           | N.D                                   |                                            |                   |               |
|             | N.D                                   |                                            |                   |               | N.D                                   |                                            |                   |               | 0.012                                 |                                            |                   |               | N.D                                   |                                            |                   |               |
|             | N.D                                   |                                            |                   |               | N.D                                   |                                            |                   |               | 0.011                                 |                                            |                   |               | N.D                                   |                                            |                   |               |
|             | N.D                                   |                                            |                   |               | N.D                                   |                                            |                   |               | 0.011                                 |                                            |                   |               | N.D                                   |                                            |                   |               |
| Middle      | 0.019                                 |                                            |                   |               | N.D                                   |                                            |                   |               | 0.15                                  |                                            |                   |               | 0.00089                               |                                            |                   |               |
|             | 0.022                                 |                                            |                   |               | N.D                                   |                                            |                   |               | 0.15                                  |                                            |                   |               | 0.0015                                |                                            |                   |               |
|             | 0.017                                 | 0.019                                      | 0.002             | 9.0           | N.D                                   |                                            |                   |               | 0.15                                  | 0.15                                       | 0.01              | 5.5           | 0.0016                                | 0.0015                                     | 0.0005            | >20           |
|             | 0.018                                 |                                            |                   |               | N.D                                   |                                            |                   |               | 0.14                                  |                                            |                   |               | 0.0013                                |                                            |                   |               |
|             | 0.019                                 |                                            |                   |               | N.D                                   |                                            |                   |               | 0.13                                  |                                            |                   |               | 0.0023                                |                                            |                   |               |
| High        | 0.38                                  |                                            |                   |               | 0.022                                 |                                            |                   |               | 2.6                                   |                                            |                   |               | 0.093                                 |                                            |                   |               |
|             | 0.44                                  |                                            |                   |               | 0.024                                 |                                            |                   |               | 2.8                                   |                                            |                   |               | 0.12                                  |                                            |                   |               |
|             | 0.43                                  | 0.43                                       | 0.03              | 6.5           | 0.027                                 | 0.024                                      | 0.002             | 8.2           | 3.2                                   | 2.8                                        | 0.2               | 7.9           | 0.11                                  | 0.11                                       | 0.01              | 9.3           |
|             | 0.45                                  |                                            |                   |               | 0.027                                 |                                            |                   |               | 2.7                                   |                                            |                   |               | 0.11                                  |                                            |                   |               |
|             | 0.44                                  |                                            |                   |               | 0.023                                 |                                            |                   |               | 2.8                                   |                                            |                   |               | 0.10                                  |                                            |                   |               |

| Sample name | Lyso-Gb3(-16)                         |                                            |                   |               | Lyso-Gb3(-18)                         |                                            |                   |               | Lyso-Gb3(+34)                         |                                            |                   |               | Lyso-Gb3(+50)                         |                                            |                   |               |
|-------------|---------------------------------------|--------------------------------------------|-------------------|---------------|---------------------------------------|--------------------------------------------|-------------------|---------------|---------------------------------------|--------------------------------------------|-------------------|---------------|---------------------------------------|--------------------------------------------|-------------------|---------------|
|             | Determined concentration (Area ratio) | Mean determined concentration (Area ratio) | S.D. (Area ratio) | Precision (%) | Determined concentration (Area ratio) | Mean determined concentration (Area ratio) | S.D. (Area ratio) | Precision (%) | Determined concentration (Area ratio) | Mean determined concentration (Area ratio) | S.D. (Area ratio) | Precision (%) | Determined concentration (Area ratio) | Mean determined concentration (Area ratio) | S.D. (Area ratio) | Precision (%) |
| Low         | 0.00019                               |                                            |                   |               | 0.0085                                |                                            |                   |               | 0.019                                 |                                            |                   |               | 0.00045                               |                                            |                   |               |
|             | N.D                                   |                                            |                   |               | 0.0086                                |                                            |                   |               | 0.019                                 |                                            |                   |               | 0.00062                               |                                            |                   |               |
|             | 0.00050                               | 0.00014                                    | 0.00022           | >20           | 0.0067                                | 0.0073                                     | 0.0012            | 17            | 0.023                                 | 0.020                                      | 0.002             | 9.2           | 0.00075                               | 0.00049                                    | 0.00020           | >20           |
|             | N.D                                   |                                            |                   |               | 0.0072                                |                                            |                   |               | 0.018                                 |                                            |                   |               | 0.00039                               |                                            |                   |               |
|             | N.D                                   |                                            |                   |               | 0.0057                                |                                            |                   |               | 0.020                                 |                                            |                   |               | 0.00024                               |                                            |                   |               |
| Middle      | 0.030                                 |                                            |                   |               | 0.037                                 |                                            |                   |               | 0.15                                  |                                            |                   |               | 0.034                                 |                                            |                   |               |
|             | 0.028                                 |                                            |                   |               | 0.045                                 |                                            |                   |               | 0.14                                  |                                            |                   |               | 0.031                                 |                                            |                   |               |
|             | 0.028                                 | 0.030                                      | 0.003             | 8.8           | 0.041                                 | 0.041                                      | 0.003             | 7.5           | 0.16                                  | 0.15                                       | 0.01              | 6.1           | 0.032                                 | 0.033                                      | 0.001             | 4.4           |
|             | 0.034                                 |                                            |                   |               | 0.039                                 |                                            |                   |               | 0.14                                  |                                            |                   |               | 0.032                                 |                                            |                   |               |
|             | 0.032                                 |                                            |                   |               | 0.041                                 |                                            |                   |               | 0.15                                  |                                            |                   |               | 0.034                                 |                                            |                   |               |
| High        | 0.46                                  |                                            |                   |               | 0.82                                  |                                            |                   |               | 2.8                                   |                                            |                   |               | 0.62                                  |                                            |                   |               |
|             | 0.56                                  |                                            |                   |               | 0.76                                  |                                            |                   |               | 2.7                                   |                                            |                   |               | 0.80                                  |                                            |                   |               |
|             | 0.68                                  | 0.58                                       | 0.08              | 14.4          | 0.63                                  | 0.71                                       | 0.08              | 11.0          | 3.1                                   | 2.8                                        | 0.2               | 8.5           | 0.76                                  | 0.73                                       | 0.07              | 9.4           |
|             | 0.58                                  |                                            |                   |               | 0.67                                  |                                            |                   |               | 2.5                                   |                                            |                   |               | 0.74                                  |                                            |                   |               |
|             | 0.64                                  |                                            |                   |               | 0.68                                  |                                            |                   |               | 2.8                                   |                                            |                   |               | 0.72                                  |                                            |                   |               |

N.D: Not detected.
