# Supplementary material for: Nano-LC-MS/MS for Quantification of Lyso-Gb3 and Its Analogues Reveals a Useful Biomarker for Fabry Disease
Source: PubMed Central journal article supplement (PMC4428877; doi:10.1371/journal.pone.0127048), 2015-05-12
Supplement: pone.0127048.s007.pdf [file pone.0127048.s007.pdf]

Table S5. Stability of lyso-Gb3 and its two analogues.

| <b>Condition</b>            | <b>Time</b> | <b>Lyso-Gb3<br/>(% Bias)</b> | <b>Lyso-Gb3(-12)<br/>(% Bias)</b> | <b>Lyso-Gb3(+14)<br/>(% Bias)</b> |
|-----------------------------|-------------|------------------------------|-----------------------------------|-----------------------------------|
| Three Freeze/Thaw<br>Cycles | -           | -1.8%                        | 8.2%                              | 3.0%                              |
| -20°C                       | 2 Weeks     | 1.7%                         | -9.5%                             | -5.1%                             |
| 4°C                         | 3 hr        | -0.2%                        | 15.3%                             | -3.1%                             |
|                             | 6 hr        | 1.2%                         | 25.7%                             | 26.5%                             |
| Room Temperature            | 3 hr        | 0.0%                         | 36.3%                             | 24.6%                             |
|                             | 6 hr        | 1.5%                         | 32.8%                             | 11.6%                             |
| Autosampler                 | 20 hr       | 1.4%                         | -5.3%                             | -11.1%                            |
|                             | 30 hr       | 1.9%                         | -3.3%                             | 0.9%                              |
